# Supplementary material for: Surgical microscope with integrated fluorescence lifetime imaging for 5-aminolevulinic acid fluorescence-guided neurosurgery
Source: PubMed Central journal article supplement (PMC7039165; doi:10.1117/1.jbo.25.7.071202), 2020-02-24

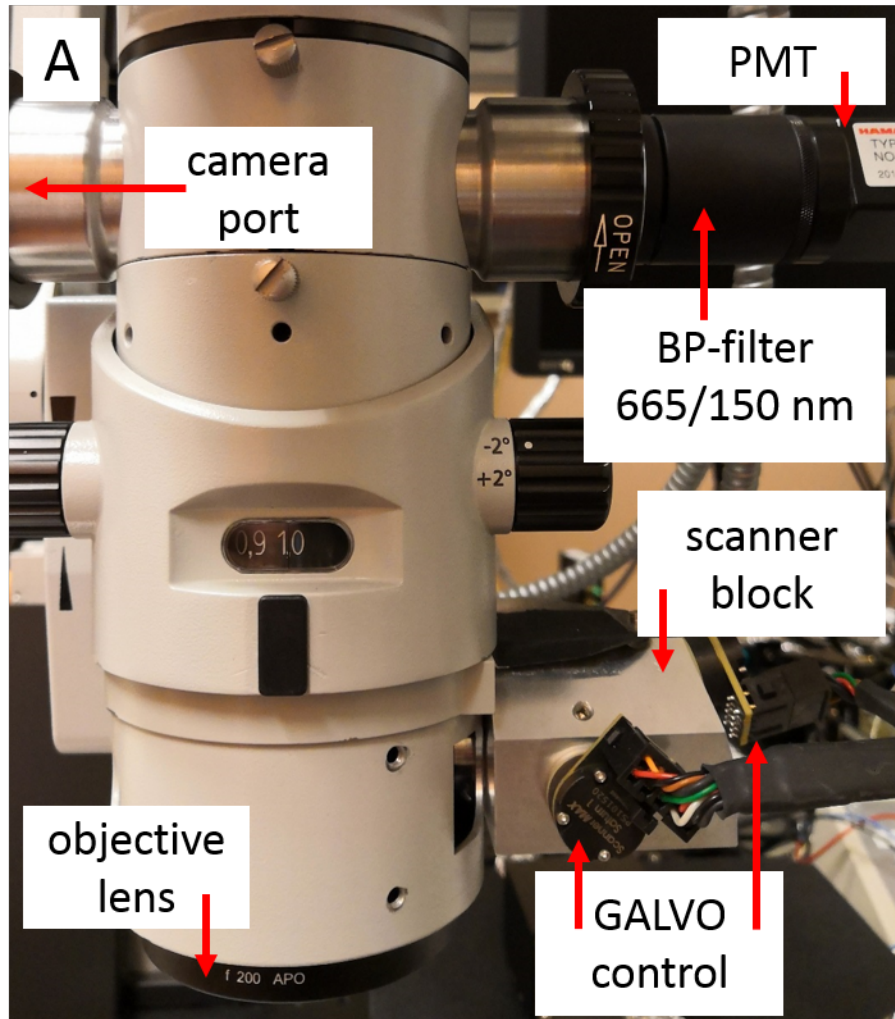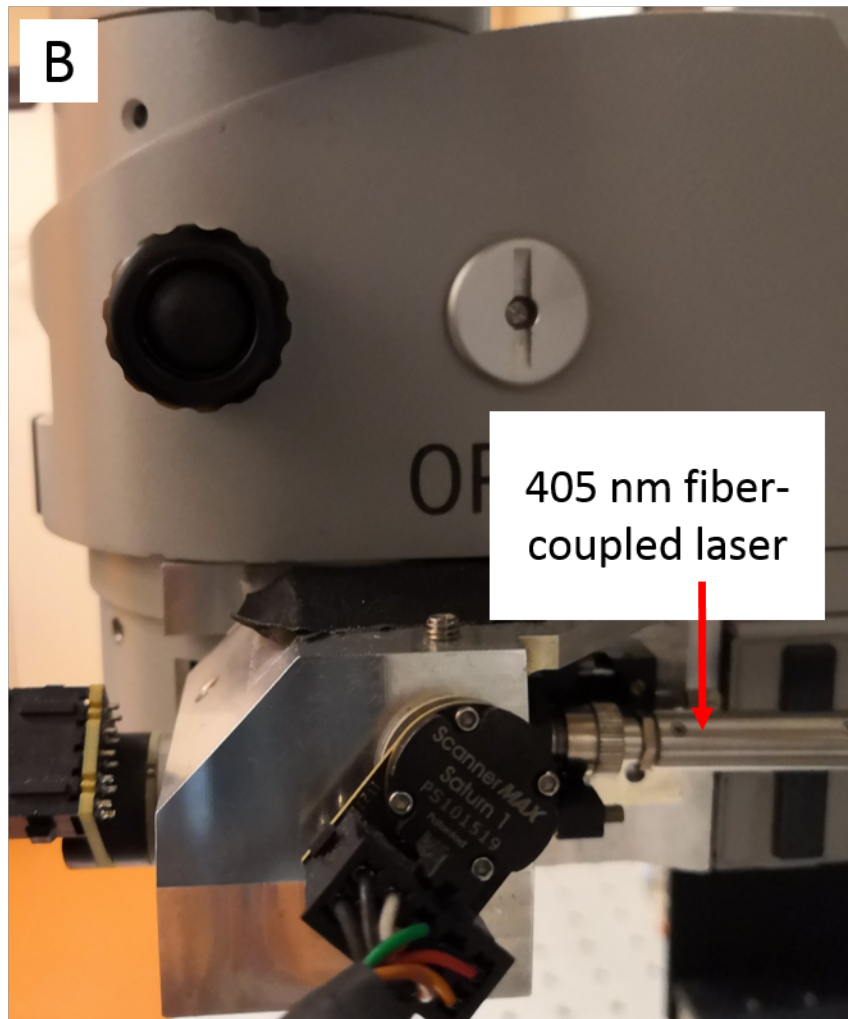

Supplement: JBO_025_071202_SD001.pdf [file JBO_025_071202_SD001.pdf]
